# Supplementary material
Source: PubMed Central journal article supplement (PMC7185870)
Supplement: NIHMS1577115-supplement-Supplementary_Information.pdf [file NIHMS1577115-supplement-Supplementary_Information.pdf]

# Supplementary Information for Electronic Conductance Resonance in non-Redox Proteins

Bintian Zhang<sup>1</sup>, Weisi Song<sup>1</sup>, Jesse Brown<sup>2</sup>, Robert Nemanich<sup>2</sup> and Stuart Lindsay<sup>1,2,3</sup>

<sup>1</sup>Biodesign Institute, <sup>2</sup>Department of Physics, <sup>3</sup>School of Molecular Sciences

Arizona State University, Tempe, AZ 87287, USA

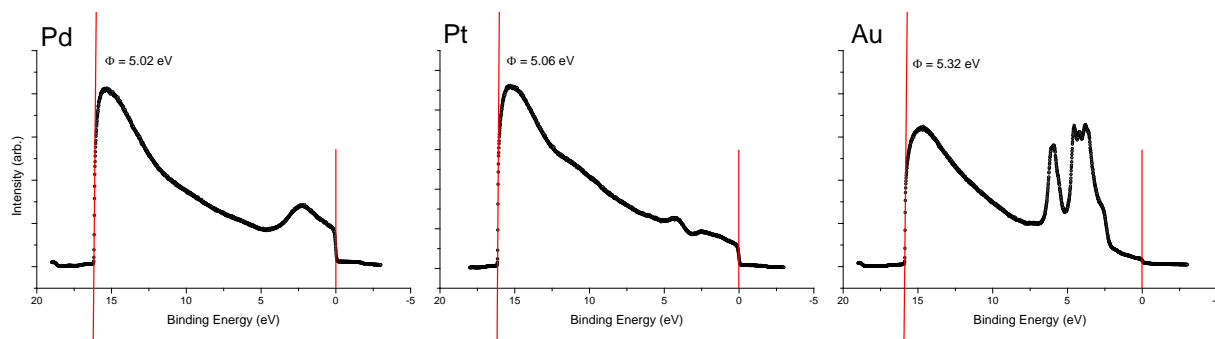

**Figure S1:** UPS spectra for the three metals after *In-Situ* hydrogen plasma cleaning. The secondary electron emission cutoff was determined using the linear fit method. The work function is the difference in energy between the photon energy and this secondary electron emission cutoff. The work function is a measure of the difference between the vacuum energy level and the Fermi Energy.

$$\Phi = \hbar\omega - x_0 \quad \text{where,} \quad \hbar\omega = 21.2 \text{ eV}$$

| Work Functions of Various Metals (eV) |           |          |      |
|---------------------------------------|-----------|----------|------|
|                                       | Palladium | Platinum | Gold |
| As Received                           | 4.57      | 4.62     | 4.85 |
| Plasma Cleaned                        | 5.02      | 5.06     | 5.32 |

**Table S1:** Work functions of the metals before and after plasma cleaning.

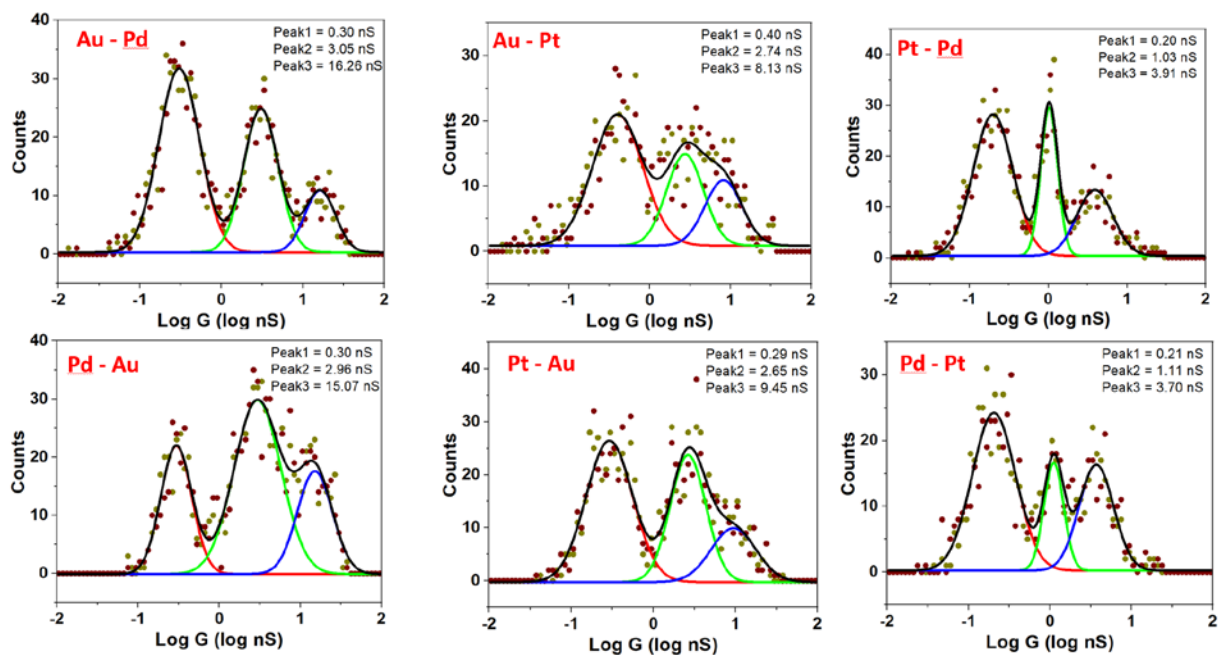

**Figure S2:** Conductance distributions for the streptavidin-biotin system (gap = 2.5 nm) for the tip (first metal listed) - substrate (second metal listed) combinations.

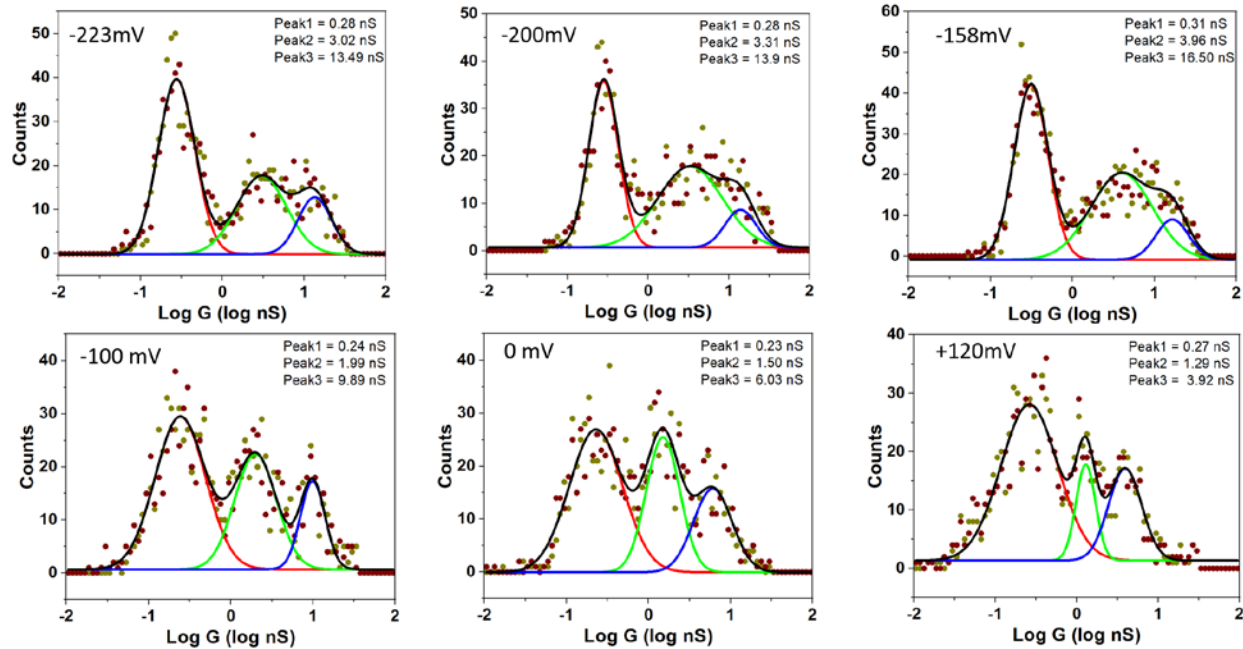

**Figure S3:** Conductance distributions for the streptavidin-biotin system (gap = 2.5 nm) for the substrate potentials as listed vs. a 10 mM salt-bridged Ag/AgCl reference with Pd electrodes. These potentials are converted to NHE by adding 380 mV.

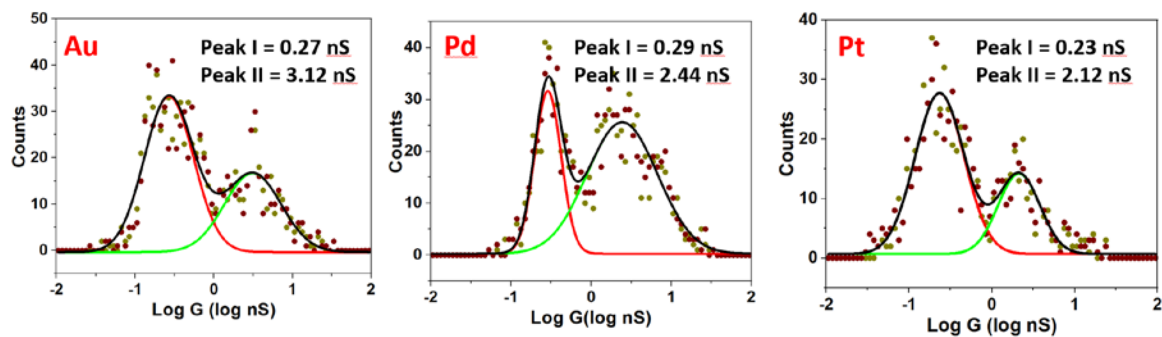

**Figure S4:** Conductance distributions for the DNP-anti DNP IgG system (gap=4.5 nm) for the three metals shown.

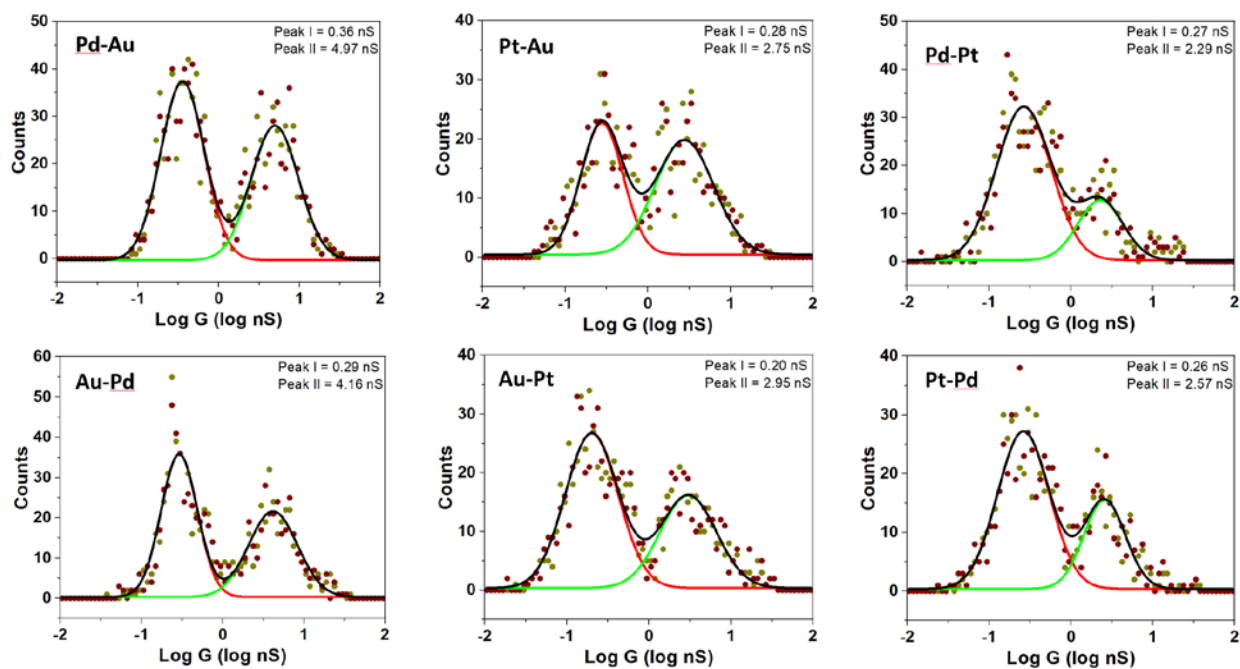

**Figure S5:** Conductance distributions for the DNP-anti DNP IgG system (gap=4.5 nm) for the tip (first metal listed) - substrate (second metal listed) combinations.

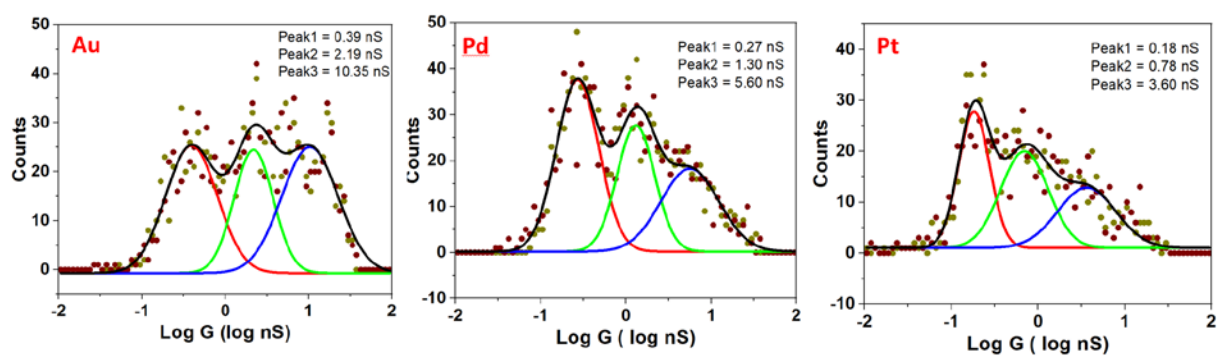

**Figure S6:** Conductance distributions for the biotin-SA- $\Phi$ 29 system (gap=4.5 nm) for the three metals shown.

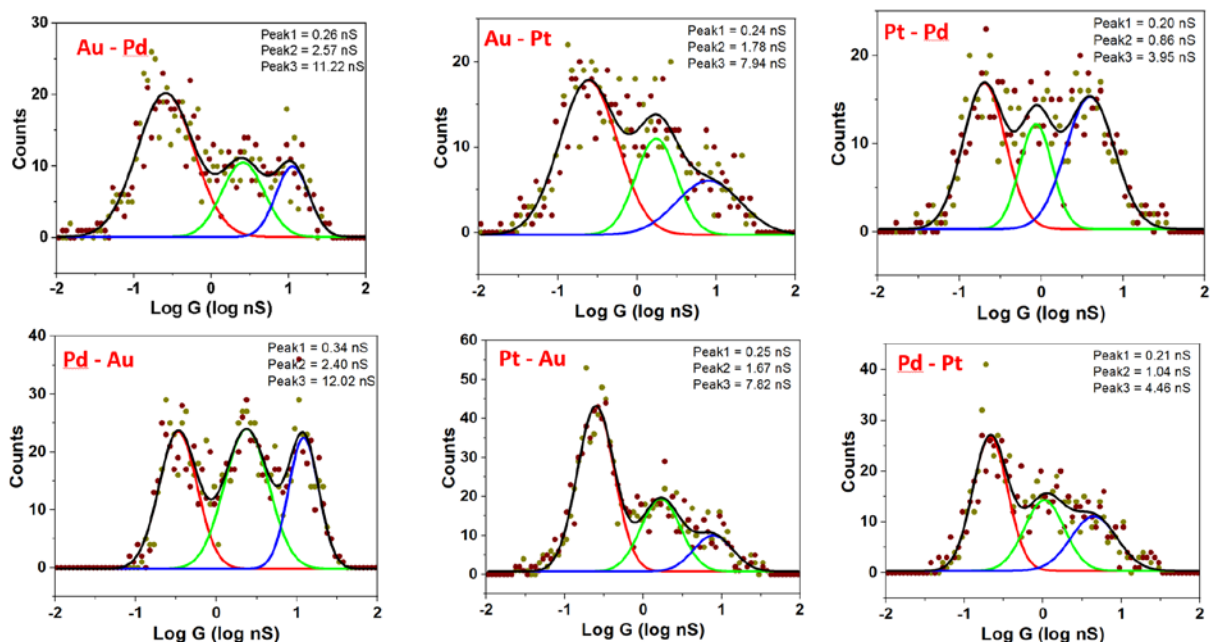

**Figure S7:** Conductance distributions for the biotin-SA- $\Phi$ 29 system (gap=4.5 nm) for the tip (first metal listed) - substrate (second metal listed) combinations.

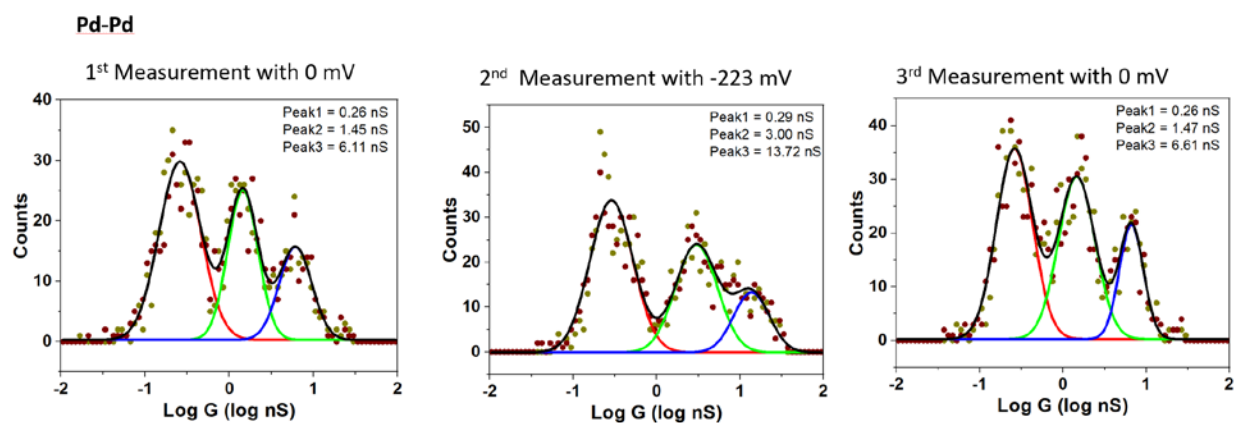

**Figure S8.** Reversibility of the conductance distributions over the range of surface potential measured (values shown are vs. the 10 mM salt-bridged Ag/AgCl electrode). Fitting parameters are listed in Table S6.

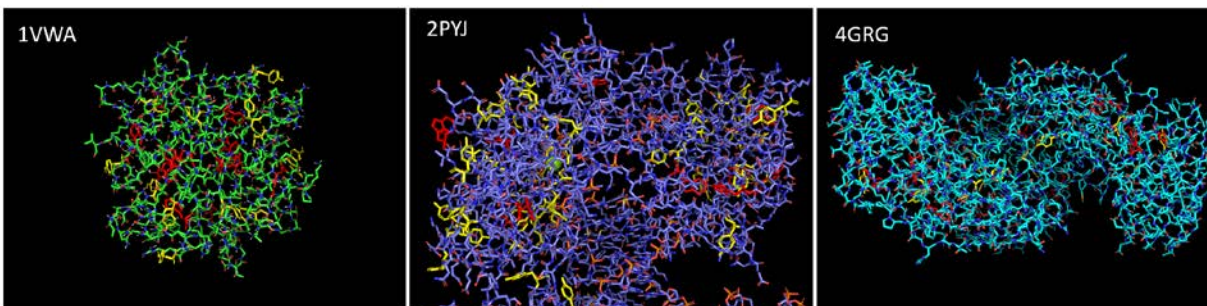

**Figure S9:** Tyrosines (yellow) and tryptophans (red) in streptavidin (1VWA),  $\Phi$ 29 polymerase (2PYJ) and an IgE molecule (4GRG) where the codes are PDB IDs.

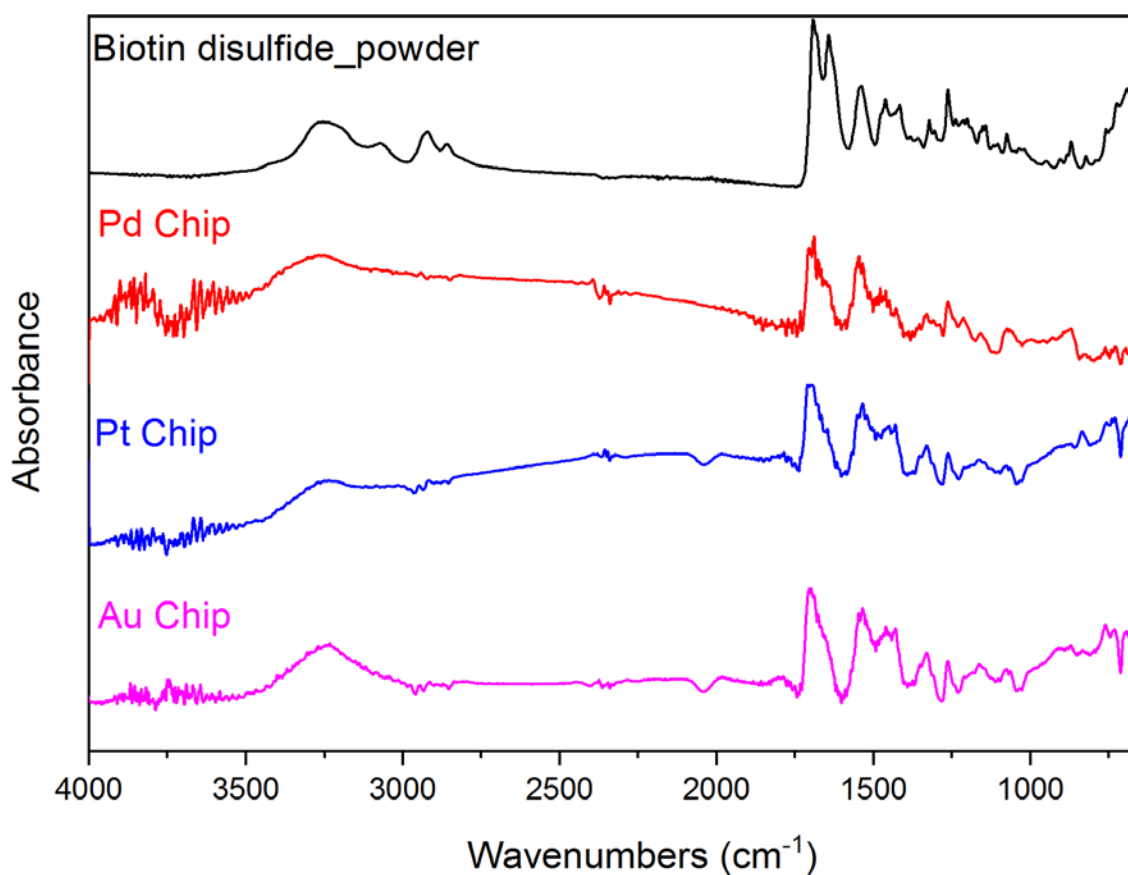

**Figure S10:** FTIR scans from Pd, Pt and Au surfaces modified with thiolated biotin. The top recording is the bulk (disulfide) powder.

| Materials (Tip-Sub) | Peak I        |                 |                    | Peak II       |                 |               | Peak III      |                 |                    |
|---------------------|---------------|-----------------|--------------------|---------------|-----------------|---------------|---------------|-----------------|--------------------|
|                     | Position (nS) | Height (Counts) | Half Width (Log G) | Position (nS) | Height (Counts) | Width (Log G) | Position (nS) | Height (Counts) | Half Width (Log G) |
| Au - Au             | 0.41±0.02     | 26.89±1.63      | 0.42±0.03          | 2.88±0.11     | 32.89±1.60      | 0.58±0.04     | 13.45±0.62    | 18.42±2.30      | 0.24±0.04          |
| Pd - Pd             | 0.26±0.01     | 52.75±1.83      | 0.60±0.04          | 1.50±0.08     | 40.99±2.93      | 0.41±0.05     | 6.80±0.63     | 31.76±1.92      | 0.59±0.08          |
| Pt - Pt             | 0.17±0.01     | 26.46±0.96      | 0.56±0.04          | 0.91±0.07     | 16.04±0.99      | 0.49±0.11     | 3.63±0.44     | 9.80±1.51       | 0.38±0.08          |
| Au - Pd             | 0.30±0.01     | 31.47±0.83      | 0.50±0.02          | 3.05±0.07     | 24.59±0.93      | 0.42±0.02     | 16.26±0.75    | 10.59±0.94      | 0.38±0.05          |
| Au - Pt             | 0.40±0.02     | 20.13±0.92      | 0.62±0.06          | 2.74±0.55     | 14.01±5.05      | 0.46±0.18     | 8.13±1.27     | 10.02±5.52      | 0.46±0.20          |
| Pt - Pd             | 0.20±0.01     | 27.82±0.85      | 0.50±0.02          | 1.03±0.01     | 29.16±1.24      | 0.22±0.01     | 3.91±0.17     | 12.95±0.90      | 0.46±0.04          |
| Pd - Au             | 0.30±0.01     | 22.01±1.04      | 0.38±0.02          | 2.96±0.14     | 29.90±0.92      | 0.58±0.04     | 15.07±0.70    | 17.68±1.15      | 0.43±0.04          |
| Pt - Au             | 0.29±0.01     | 26.67±1.10      | 0.57±0.03          | 2.65±0.12     | 23.95±1.42      | 0.43±0.04     | 9.45±1.41     | 10.16±1.61      | 0.55±0.07          |
| Pd - Pt             | 0.20±0.01     | 23.99±0.81      | 0.53±0.02          | 1.11±0.03     | 16.38±1.16      | 0.24±0.03     | 3.70±0.14     | 16.11±0.90      | 0.43±0.04          |

**Table S2.** Conductance measurement of streptavidin with different materials as the electrodes



| Materials<br>(Tip-Sub) | Peak I           |                    |                          | Peak II          |                    |                  | Peak III         |                    |                          |
|------------------------|------------------|--------------------|--------------------------|------------------|--------------------|------------------|------------------|--------------------|--------------------------|
|                        | Position<br>(nS) | Height<br>(Counts) | Half<br>Width<br>(Log G) | Position<br>(nS) | Height<br>(Counts) | Width<br>(Log G) | Position<br>(nS) | Height<br>(Counts) | Half<br>Width<br>(Log G) |
| Au - Au                | 0.39±0.03        | 26.04±1.30         | 0.62±0.07                | 2.19±0.15        | 25.16±1.84         | 0.47±0.06        | 10.35±0.72       | 25.74±1.56         | 0.68±0.08                |
| Pd - Pd                | 0.27±0.01        | 37.35±1.24         | 0.50±0.02                | 1.30±0.09        | 27.46±1.52         | 0.44±0.03        | 5.60±0.52        | 18.04±1.23         | 0.68±0.06                |
| Pt - Pt                | 0.18±0.004       | 26.71±1.26         | 0.36±0.02                | 0.78±0.05        | 18.95±1.12         | 0.55±0.07        | 3.60±0.33        | 11.84±0.99         | 0.67±0                   |
| Au - Pd                | 0.26±0.01        | 20.12±0.77         | 0.74±0.04                | 2.57±0.30        | 10.43±0.88         | 0.54±0.12        | 11.22±0.76       | 9.85±0.94          | 0.43±0.06                |
| Au - Pt                | 0.24±0.02        | 18.08±0.75         | 0.73±0.06                | 1.78±0.16        | 11.27±1.36         | 0.52±0.09        | 7.94±1.85        | 6.34±1.12          | 0.81±0.15                |
| Pt - Pd                | 0.20±0.01        | 16.57±0.76         | 0.52±0.05                | 0.86±0.07        | 11.91±1.30         | 0.40±0.08        | 3.95±0.32        | 15.02±0.72         | 0.60±0.06                |
| Pd - Au                | 0.34±0.01        | 23.68±1.04         | 0.47±0.03                | 2.4±0.11         | 24.12±0.91         | 0.55±0.08        | 12.02±0.33       | 22.62±1.14         | 0.38±0.03                |
| Pt - Au                | 0.25±0.01        | 42.33±1.06         | 0.47±0.02                | 1.67±0.09        | 18.62±1.09         | 0.51±0.06        | 7.82±0.92        | 9.27±1.28          | 0.50±0.12                |
| Pd - Pt                | 0.21±0.01        | 26.38±1.01         | 0.44±0.03                | 1.04±0.08        | 13.88±0.99         | 0.51±0.10        | 4.46±0.56        | 10.67±1.44         | 0.59±0.05                |

**Table S3.** Conductance measurement of phi29 with different materials as the electrodes

| Materials<br>(Tip-Sub) | Peak I           |                    |                       | Peak II          |                    |                       |
|------------------------|------------------|--------------------|-----------------------|------------------|--------------------|-----------------------|
|                        | Position<br>(nS) | Height<br>(Counts) | Half Width<br>(Log G) | Position<br>(nS) | Height<br>(Counts) | Half Width<br>(Log G) |
| Au - Au                | 0.27±0.01        | 33.64±1.18         | 0.63±0.03             | 3.12±0.21        | 17.06±1.13         | 0.72±0.08             |

|         |           |            |           |           |            |           |
|---------|-----------|------------|-----------|-----------|------------|-----------|
| Pd - Pd | 0.29±0.01 | 31.34±1.29 | 0.33±0.02 | 2.44±0.1  | 25.35±0.83 | 0.88±0.04 |
| Pt - Pt | 0.23±0.01 | 27.03±0.88 | 0.59±0.03 | 2.12±0.1  | 13.52±0.93 | 0.51±0.05 |
| Au - Pd | 0.29±0.01 | 35.49±1.31 | 0.45±0.02 | 4.16±0.17 | 21.31±1.16 | 0.60±0.04 |
| Au - Pt | 0.20±0.01 | 26.33±0.92 | 0.65±0.03 | 2.95±0.16 | 15.79±0.90 | 0.68±0.05 |
| Pt - Pd | 0.26±0.01 | 26.81±0.91 | 0.63±0.03 | 2.57±0.13 | 15.08±0.98 | 0.51±0.04 |
| Pd - Au | 0.36±0.01 | 37.69±1.23 | 0.54±0.02 | 4.97±0.15 | 28.36±1.19 | 0.59±0.03 |
| Pt - Au | 0.28±0.01 | 22.22±0.99 | 0.51±0.03 | 2.75±0.12 | 19.35±0.92 | 0.71±0.05 |
| Pd - Pt | 0.27±0.01 | 31.91±1.07 | 0.67±0.03 | 2.29±0.19 | 12.45±1.12 | 0.55±0.04 |

**Table S4.** Conductance measurement of anti-DNP antibody with different materials

| Polarized potential (mV) | Peak I        |                 |                    | Peak II       |                 |                    | Peak III      |                 |                    |
|--------------------------|---------------|-----------------|--------------------|---------------|-----------------|--------------------|---------------|-----------------|--------------------|
|                          | Position (nS) | Height (Counts) | Half Width (Log G) | Position (nS) | Height (Counts) | Half Width (Log G) | Position (nS) | Height (Counts) | Half Width (Log G) |
| -223 mV                  | 0.28±0.01     | 39.74±1.15      | 0.45±0.02          | 3.02±0.32     | 17.82±1.09      | 0.61±0.09          | 13.49±1.41    | 12.96±2.01      | 0.41±0.07          |
| -200 mV                  | 0.28±0.01     | 35.00±1.24      | 0.37±0.02          | 3.31±0.25     | 17.14±0.97      | 0.80±0.05          | 13.90±1.24    | 7.96±1.47       | 0.39±0.02          |
| -158 mV                  | 0.31±0.01     | 42.85±1.10      | 0.42±0.02          | 3.96±0.25     | 21.28±1.12      | 0.75±0             | 16.50±1.06    | 9.86±1.32       | 0.40±0.06          |
| -100 mV                  | 0.24±0.01     | 28.78±1.08      | 0.61±0.04          | 1.99±0.09     | 21.70±1.23      | 0.51±0.05          | 9.89±0.40     | 16.60±1.46      | 0.30±0.04          |
| 0 mV                     | 0.23±0.01     | 26.96±1.12      | 0.65±0.05          | 1.50±0.08     | 25.48±1.51      | 0.41±0.05          | 6.03±0.63     | 15.79±1.36      | 0.47±0.08          |
| +120 mV                  | 0.27±0.01     | 26.71±0.86      | 0.70±0.01          | 1.29±0.05     | 16.42±1.53      | 0.24±0.03          | 3.92±0.21     | 15.73±1.15      | 0.41±0.05          |

**Table S5.** Conductance as a function of surface polarization measurement of streptavidin system (Pd-Pd).

| Polarized potential (mV) | Peak I        |                 |                    | Peak II       |                 |                    | Peak III      |                 |                    |
|--------------------------|---------------|-----------------|--------------------|---------------|-----------------|--------------------|---------------|-----------------|--------------------|
|                          | Position (nS) | Height (Counts) | Half Width (Log G) | Position (nS) | Height (Counts) | Half Width (Log G) | Position (nS) | Height (Counts) | Half Width (Log G) |
| 1 <sup>st</sup> 0 mV     | 0.26±0.01     | 29.49±0.93      | 0.50±0.02          | 1.45±0.04     | 24.74±1.08      | 0.36±0.03          | 6.11±0.26     | 15.40±1.03      | 0.39±0.04          |
| 2 <sup>nd</sup> -223 mV  | 0.29±0.01     | 33.86±1.23      | 0.52±0.02          | 3.00±0.12     | 24.00±1.30      | 0.50±0.04          | 13.72±1.08    | 13.34±1.46      | 0.43±0.05          |
| 3 <sup>rd</sup> 0 mV     | 0.26±0.01     | 35.37±1.16      | 0.44±0.02          | 1.47±0.04     | 30.18±1.24      | 0.44±0.03          | 6.61±0.19     | 21.23±1.39      | 0.29±0.03          |

**Table S6.** Reversibility measurement with polarization control
